# 1 Network Medicine Framework Shows Proximity of Polyphenol Targets and 2 Disease Proteins is Predictive of the Therapeutic Effects of Polyphenols

3  
4 Italo F. do Valle<sup>1</sup>, Harvey G. Roweth<sup>2,3</sup>, Michael W. Malloy<sup>2,3</sup>, Sofia Moco<sup>4</sup>, Denis  
5 Barron<sup>4</sup>, Elisabeth Battinelli<sup>2,3</sup>, Joseph Loscalzo<sup>3,5</sup>, Albert-László Barabási<sup>1,6,7</sup>

6  
7 <sup>1</sup> Network Science Institute and Department of Physics, Northeastern University, Boston, MA, USA

8 <sup>2</sup> Division of Hematology, Department of Medicine, Brigham and Women's Hospital, Boston, MA, USA

9 <sup>3</sup> Harvard Medical School, Boston, MA, USA

10 <sup>4</sup> Nestle Institute of Health Sciences, Lausanne, Switzerland

11 <sup>5</sup> Department of Medicine Brigham and Women's Hospital

12 <sup>6</sup> Channing Division of Network Medicine, Department of Medicine, Brigham and Women's Hospital, Harvard Medical  
13 School, Boston, MA, USA

14 <sup>7</sup> Department of Network and Data Science, Central European University, Budapest, Hungary

## 15 16 **Abstract**

17  
18 Polyphenols, natural products present in plant-based foods, play a protective role  
19 against several complex diseases through their antioxidant activity and by diverse  
20 molecular mechanisms. Here we developed a network medicine framework to uncover  
21 the mechanistic roles of polyphenols on health by considering the molecular interactions  
22 between polyphenol protein targets and proteins associated with diseases. We find that  
23 the protein targets of polyphenols cluster in specific neighborhoods of the human  
24 interactome, whose network proximity to disease proteins is predictive of the molecule's  
25 known therapeutic effects. The methodology recovers known associations, such as the  
26 effect of epigallocatechin 3-O-gallate on type 2 diabetes, and predicts that rosmarinic  
27 acid (RA) has a direct impact on platelet function, representing a novel mechanism  
28 through which it could affect cardiovascular health. We experimentally confirm that RA  
29 inhibits platelet aggregation and alpha granule secretion through inhibition of protein  
30 tyrosine phosphorylation, offering direct support for the predicted molecular mechanism.  
31 Our framework represents a starting point for mechanistic interpretation of the health  
32 effects underlying food-related compounds, allowing us to integrate into a predictive  
33 framework knowledge on food metabolism, bioavailability, and drug interaction.

## 34 **Introduction**

35

36 Diet plays a defining role in human health. Indeed, while poor diet can significantly  
37 increase the risk for coronary heart disease (CHD) and type 2 diabetes mellitus (T2D), a  
38 healthy diet can play a protective role, even mitigating genetic risk for CHD<sup>1</sup>.

39 Polyphenols are a class of compounds present in plant-based foods, from fruits to  
40 vegetables, nuts, seeds, beans (e.g. coffee, cocoa), herbs, spices, tea, and wine, with  
41 well documented protective role as antioxidants, which affect several diseases, from  
42 cancer to T2D, cardiovascular, and neurodegenerative diseases<sup>2,3</sup>. Previous efforts  
43 profiled over 500 polyphenols in more than 400 foods<sup>4,5</sup> and have documented the high  
44 diversity of polyphenols to which humans are exposed through their diet, ranging from  
45 flavonoids to phenolic acids, lignans, and stilbenes.

46 The underlying molecular mechanisms through which specific polyphenols exert  
47 their beneficial effects on human health remain largely unexplored. From a mechanistic  
48 perspective, dietary polyphenols are not engaged in endogenous metabolic processes  
49 of anabolism and catabolism, but rather affect human health through their anti- or pro-  
50 oxidant activity<sup>6</sup>, by binding to proteins and modulating their activity<sup>7,8</sup>, interacting with  
51 digestive enzymes<sup>9</sup>, and modulating gut microbiota growth<sup>10,11</sup>. Yet, the variety of  
52 experimental settings and the limited scope of studies that explore the molecular effects  
53 of polyphenols have, to date, offered a range of often conflicting evidence. For example,  
54 two clinical trials, both limited in terms of the number of subjects and the intervention  
55 periods, resulted in conflicting conclusions about the beneficial effects of resveratrol on  
56 glycemic control in T2D patients<sup>12,13</sup>. We, therefore, need a framework to interpret the  
57 evidence present in the literature, and to offer in-depth mechanistic predictions on the  
58 molecular pathways responsible for the health implications of polyphenols present in  
59 diet. Ultimately, these insights could help us provide evidence on causal diet-health  
60 associations, guidelines of food consumption for different individuals, and help to  
61 develop novel diagnostic and therapeutic strategies, which may lead to the synthesis of  
62 novel drugs.

63 Here, we address this challenge by developing a network medicine framework to  
64 capture the molecular interactions between polyphenols and their cellular binding

65 targets, unveiling their relationship to complex diseases. The developed framework is  
66 based on the human interactome, a comprehensive subcellular network consisting of all  
67 known physical interactions between human proteins, which has been validated  
68 previously as a platform for understanding disease mechanisms<sup>14,15</sup>, rational drug target  
69 identification, and drug repurposing<sup>16,17</sup>.

70 We find that the proteins to which polyphenols bind form identifiable  
71 neighborhoods in the human interactome, allowing us to demonstrate that the proximity  
72 between polyphenol targets and proteins associated with specific diseases is predictive  
73 of the known therapeutic effects of polyphenols. Finally, we unveil the potential  
74 therapeutic effects of rosmarinic acid (RA) on vascular diseases (V), predicting that its  
75 mechanism of action is related to modulation of platelet function. We confirm this  
76 prediction by experiments that indicate that RA modulates platelet function *in vitro* by  
77 inhibiting tyrosine protein phosphorylation. Altogether, our results demonstrate that the  
78 network-based relationship between disease proteins and polyphenol targets offers a  
79 tool to systematically unveil the health effects of polyphenols.

80

## 81 **Results**

82

### 83 Polyphenol Targets Cluster in Specific Functional Neighborhoods of the Interactome

84

85 We mapped the targets of 65 polyphenols (see Methods) to the human  
86 interactome, consisting of 17,651 proteins and 351,393 interactions (Fig 1a,b). We find  
87 that 19 of the 65 polyphenols have only one protein target, while a few polyphenols  
88 have an exceptional number of targets (Fig 1c). We computed the Jaccard Index (JI) of  
89 the protein targets of each polyphenol pair, finding only a limited similarity of targets  
90 among different polyphenols (average JI = 0.0206) (Supplementary Figure 1a). Even  
91 though the average JI is small, it is still significantly higher ( $Z = 147$ , Supplementary  
92 Figure 1b) than the JI expected if the polyphenol targets were randomly assigned from  
93 the pool of all network proteins with degrees matching the original set. This finding  
94 suggests that while each polyphenol targets a specific set of proteins, their targets are  
95 confined to a common pool of proteins, likely determined by commonalities in the

96 polyphenol binding domains of the three-dimensional structure of the protein targets<sup>18</sup>.  
97 Gene Ontology (GO) Enrichment Analysis recovers existing mechanisms<sup>8</sup> and also  
98 helps identify new processes related to polyphenol protein targets, such as post-  
99 translation protein modifications, regulation, and xenobiotic metabolism (Fig 1d). The  
100 enriched GO categories indicate that polyphenols modulate common regulatory  
101 processes, but the low similarity in their protein targets, illustrated by the low average JI,  
102 indicates that they target different processes within the same process.

103 We next asked whether the polyphenol targets cluster in specific regions of the  
104 human interactome. We focused on polyphenols with more than two targets (n=46, Fig  
105 2), and measured the size and significance of the largest connected component (LCC)  
106 formed by the targets of each polyphenol. We found that 25 of the 46 polyphenols have  
107 a larger LCC than expected by chance (Z-score > 1.95) (Fig 1e, Fig 2). In agreement  
108 with experimental evidence documenting the effect of polyphenols on multiple  
109 pathways<sup>19</sup>, we find that ten polyphenols have their targets organized in multiple  
110 connected components of size > 2.

111 These results indicate that the targets of polyphenols modulate specific well  
112 localized neighborhoods of the interactome (Fig 2, Supplementary Figure 1c). This  
113 prompted us to explore if the interactome regions targeted by the polyphenols reside  
114 within network neighborhoods associated with specific diseases, seeking a network-  
115 based framework to unveil the molecular mechanism through which specific  
116 polyphenols modulate health.

117

## 118 Proximity Between Polyphenol Targets and Disease Proteins Reveals their Therapeutic 119 Effects

120

121 Polyphenols can be viewed as drugs in that they bind to specific proteins, affecting their  
122 ability to perform their normal functions. We, therefore, hypothesized that we can apply  
123 the network-based framework used to predict the efficacy of drugs in specific  
124 diseases<sup>16,17</sup> to also predict the therapeutic effects of polyphenols. The closer the  
125 targets of a polyphenol are to disease proteins, the more likely that the polyphenol will  
126 affect the disease phenotype. We, therefore, calculated the network proximity between

127 polyphenol targets and proteins associated with 299 diseases using the closest  
128 measure,  $d_c$ , representing the average shortest path length between each polyphenol  
129 target and the nearest disease protein (see Methods). Consider for example (-)-  
130 epigallocatechin 3-O-gallate (EGCG), a polyphenol abundant in green tea.  
131 Epidemiological studies have found a positive relationship between green tea  
132 consumption and reduced risk of T2D<sup>20,21</sup>, and physiological and biochemical studies  
133 have shown that EGCG presents glucose-lowering effects in both *in vitro* and *in vivo*  
134 models<sup>22,23</sup>. We identified 54 experimentally validated EGCG protein targets and  
135 mapped them to the interactome, finding that the EGCG targets form an LCC of 17  
136 proteins ( $Z = 7.61$ ) (Fig 3a). We also computed the network-based distance between  
137 EGCG targets and 83 proteins associated with T2D, finding that the two sets are  
138 significantly proximal to each other. We ranked all 299 diseases based on the network  
139 proximity to the EGCG targets in order to determine whether we can recover the 82  
140 diseases in which EGCG has known therapeutic effects according to the CTD database.  
141 By this analysis, we were able to recover 15 previously known therapeutic associations  
142 among the top 20 ranked diseases (Table 1), confirming that network-proximity can  
143 discriminate between known and unknown disease associations for polyphenols, as  
144 previously confirmed among drugs<sup>16,17</sup>.

145 We expanded these methods to all polyphenol-disease pairs, to predict diseases  
146 for which specific polyphenols might have therapeutic effects. For this analysis, we  
147 grouped all 19,435 polyphenol-disease associations between 65 polyphenols and 299  
148 diseases into known (1,525) and unknown (17,910) associations. The known  
149 polyphenol-disease set was retrieved from CTD, which is limited to manually curated  
150 associations for which there is literature-based evidence. For each polyphenol, we  
151 tested how well network proximity discriminates between the known and unknown sets  
152 by evaluating the area under the Receiving Operating Characteristic (ROC) curve  
153 (AUC). For EGCG, network proximity offers good discriminative power (AUC = 0.78, CI:  
154 0.70 - 0.86) between diseases with known and unknown therapeutic associations (Table  
155 1). We find that network proximity ( $d_c$ ) offers predictive power with an AUC > 0.7 for 31  
156 polyphenols (Fig 3b). The methodology recovers many associations well documented in  
157 the literature, like the beneficial effects of umbelliferone on colonrectal neoplasms<sup>24,25</sup>.

158 In Table 2 we summarize the top 10 polyphenols for which the network medicine  
159 framework offers the best predictive power of therapeutic effects, limiting the entries to  
160 predictive performance of AUC > 0.6 and performance over top predictions with  
161 precision > 0.6. Given the lack of data on true negative examples, we considered  
162 unknown associations as negative cases, observing the same trend when we used an  
163 alternative performance metric that does not require true negative labels (i.e. AUC of  
164 the Precision-Recall curve) (Supplementary Figure 2).

165 Finally, we performed multiple robustness checks to exclude the role of potential  
166 biases in the input data. To test if the predictions are biased by the set of known  
167 associations retrieved from CTD, we randomly selected 100 papers from PubMed  
168 containing MeSH terms that tag EGCG to diseases. We manually curated the evidence  
169 for EGCG's therapeutic effects for the diseases discussed in the published papers,  
170 excluding reviews and non-English language publications. The dataset was processed  
171 to include implicit associations (see Methods), resulting in a total of 113 diseases  
172 associated with EGCG, of which 58 overlap with the associations reported by CTD (Fig  
173 3c). We observed that the predictive power of network proximity was unaffected by  
174 whether we considered the annotations from CTD, the manually curated list, or the  
175 union of both (Fig 3d). To test the role of potential biases in the interactome, we  
176 repeated our analysis using only high-quality polyphenol-protein interactions retrieved  
177 from ligand-protein 3D resolved structures (Supplementary Figure 1d) and a subset of  
178 the interactome derived from an unbiased high-throughput screening (Supplementary  
179 Figure 1f). We find that the predictive power was largely unchanged, indicating that the  
180 literature bias in the interactome does not affect our findings. Finally, we re-tested the  
181 predictive performance by considering not only the therapeutic polyphenol-disease  
182 associations, but also the marker/mechanism ones - another type of curated association  
183 available in CTD - finding that the predictive power remains largely unchanged  
184 (Supplementary Notes, Supplementary Figure 3).

185

186 Network Proximity Predicts Gene Expression Perturbation Induced by Polyphenols

187

188 To validate that network proximity reflects biological activity of polyphenols observed in  
189 experimental data, we retrieved expression perturbation signatures from the  
190 Connectivity Map database<sup>26</sup> for the treatment of the breast cancer MCF7 cell line with  
191 21 polyphenols (Supplementary Table 1, Supplementary Figure 4). We investigated the  
192 relationship between the extent to which polyphenols perturb the expression of disease  
193 genes, the network proximity between the polyphenol targets and disease proteins, and  
194 their known therapeutic effects (Fig 4a). For example, we observe different perturbation  
195 profiles for gene pools associated with different diseases: for treatment with genistein (1  
196  $\mu\text{M}$ , 6 hours) we observe 10 skin disease genes with perturbation score  $> 2$ , while we  
197 observe only one highly perturbed cerebrovascular disorder gene (Fig 4b). Indeed,  
198 network proximity indicates that skin disease is closer to the genistein targets than  
199 cerebrovascular disorder, suggesting a relationship between network proximity, gene  
200 expression perturbation, and the therapeutic effects of the polyphenol (Fig 4a). To test  
201 this hypothesis, we computed an enrichment score that measures the  
202 overrepresentation of disease genes among the most perturbed genes (see Methods),  
203 finding 13 diseases that have their genes significantly enriched among the most  
204 deregulated genes by genistein, of which 4 have known therapeutic associations. We  
205 find that these four diseases are significantly closer to the genistein targets than the  
206 nine diseases with unknown therapeutic associations (Fig 4c). We observed a similar  
207 trend for treatments with other polyphenols, whether we use the same (1 $\mu\text{M}$ , Fig 4c) or  
208 different (100nM to 10 $\mu\text{M}$ , Supplementary Figure 5) concentrations. This result suggests  
209 that changes in gene expression caused by a polyphenol are indicative of its therapeutic  
210 effects, but only if the observed expression change is limited to proteins proximal to the  
211 polyphenol targets (Fig 4a).

212 Consequently, network proximity should also be predictive of the overall gene  
213 expression perturbation caused by a polyphenol on the genes of a given disease. To  
214 test this hypothesis, in each experimental combination defined by the polyphenol type  
215 and its concentration, we evaluated the maximum perturbation among genes for each  
216 disease. We then compared the magnitude of the observed perturbation between  
217 diseases that were proximal ( $d_c < 25^{\text{th}}$  percentile,  $Z_{d_c} < -0.5$ ) or distal ( $d_c > 75^{\text{th}}$   
218 percentile,  $Z_{d_c} > -0.5$ ) to the polyphenol targets. Figures 5a-b and Supplementary Figure

219 6 show the results for the genistein treatment (1 $\mu$ M, 6 hours), indicating that diseases  
220 proximal to the polyphenol targets show higher maximum perturbation values than distal  
221 diseases. The same trend is observed for other polyphenols when we use different  $d_c$   
222 and  $Z_{d_c}$  thresholds for defining proximal and distant diseases (Figs 5b, Supplementary  
223 Figures 6-9), confirming that the impact of a polyphenol on cellular signaling pathways  
224 is localized in the network space, being greater in the vicinity of the polyphenol targets  
225 compared to neighborhoods remote from these targets. We also considered gene  
226 expression perturbations in the network vicinity of the polyphenol targets, regardless of  
227 whether the proteins were disease proteins or not, observing higher perturbation scores  
228 for proximal proteins in 12 out of 21 polyphenols tested at 10 $\mu$ M (Supplementary Figure  
229 10). Finally, we find that the enrichment score of perturbed genes among disease genes  
230 is not as predictive of the polyphenol therapeutic effects as network proximity  
231 (Supplementary Figure 11).

232 Altogether these results indicate that network proximity offers a mechanistic  
233 interpretation for the gene expression perturbations induced by polyphenols on disease  
234 genes. They also show that network proximity can indicate when gene expression  
235 perturbations result in therapeutic effects, suggesting that future studies could integrate  
236 gene expression (whenever available) with network proximity as they aim to more  
237 accurately prioritize polyphenol-disease associations.

238

### 239 Experimental Evidence Confirms that Rosmarinic Acid Modulates Platelet Function

240

241 To demonstrate how the network-based framework can facilitate the mechanistic  
242 interpretation of the therapeutic effects of selected polyphenols, we next focus on  
243 vascular diseases (V). Of 65 polyphenols evaluated in this study, we found 27 to have  
244 associations to V, as their targets were within the V network neighborhood  
245 (Supplementary Table 3). We, therefore, inspected the targets of 15 of the 27  
246 polyphenols with 10 or less targets. The network analysis identified direct links between  
247 biological processes related to vascular health and the targets of three polyphenols:  
248 gallic acid, rosmarinic acid, and 1,4-naphthoquinone (Supplementary Figure 12,  
249 Supplementary Notes). The network neighborhood containing the targets of these



250 polyphenols suggests that gallic acid activity involves thrombus dissolution processes,  
251 rosmarinic acid acts on platelet activation and antioxidant pathways through FYN and its  
252 neighbors, and 1,4-naphthoquinone acts on signaling pathways of vascular cells  
253 through MAP2K1 activity (Supplementary Figure 12, Supplementary Notes).

254 To validate the developed framework, we set out to obtain direct experimental  
255 evidence of the predicted mechanistic role of rosmarinic acid (RA) in V. The RA targets  
256 are in close proximity to proteins related to platelet function, forming the RA-V-platelet  
257 module: a connected component formed by the RA target FYN and the V proteins  
258 associated with platelet function PDE4D, CD36, and APP (Fig 6a). We, therefore, asked  
259 whether RA influenced platelet activation *in vitro*. As platelets can be stimulated through  
260 different activation pathways, RA effects can, in principle, occur in any of them. To test  
261 these different possibilities, we pretreated platelets with RA and then activated with: 1)  
262 glycoprotein VI by collagen or collagen-related peptide (CRP/CRPXL); 2) protease-  
263 activated receptors-1,4 by thrombin receptor activator peptide-6 (TRAP-6); 3)  
264 prostanoid thromboxane receptor by the thromboxane A<sub>2</sub> analogue (U46619); and 4)  
265 P2Y<sub>1/12</sub> receptor by adenosine diphosphate (ADP)<sup>27</sup>. When we compared the network  
266 distance between each stimulant receptor and the RA-V-platelet module (Fig 6a), we  
267 observed that the receptors for CRP/CRPXL, TRAP-6, and U46619 are closer than  
268 random expectation, while the receptor for ADP is more distant (Fig 6b). We expected  
269 that platelets would be most affected by RA when treated with stimulants whose  
270 receptors are most proximal to the RA-V-platelet module, i.e., CRP/CRPXL, TRAP-6,  
271 and U46619, and as a control, we expect no effect for the distant ADP receptor. The  
272 experiments confirm this prediction: RA inhibits collagen-mediated platelet aggregation  
273 (Fig 6c) and impairs dense granule secretion induced by CRPXL, TRAP-6, and U46619  
274 (Supplementary Figure 13). RA-treated platelets also displayed dampened alpha-  
275 granule secretion (Fig 6d) and integrin  $\alpha$ IIb $\beta$ 3 activation (Supplementary Figure 13) in  
276 response to U46619. As expected, RA did not affect platelet function when we used an  
277 agonist whose receptor is distant from the RA-V-module, i.e., ADP. These findings  
278 suggest that RA impairs basic hallmarks of platelet activation via strong network effects,  
279 supporting our hypothesis that the proximity between RA targets and the neighborhood  
280 associated with platelet function (Fig 6a) could in part explain RA's impact on V.

281 We next searched to clarify the molecular mechanisms involved in the impact of  
282 RA on platelets. Given that platelet activation is coordinated by several kinases, we  
283 hypothesized that RA inhibits platelet function by blocking agonist-induced protein  
284 tyrosine phosphorylation. We observed that RA-treated platelets demonstrated a dose-  
285 dependent reduction in total tyrosine phosphorylation in response to CRPXL, TRAP-6  
286 and U46619 (Fig 6e). Given that RA caused a substantial decrease in phosphorylation  
287 of proteins with atomic mass between 50-60 KDa (Fig 6e), we hypothesized that RA  
288 may reduce phosphorylation of FYN (59 KDa), or other similarly sized members of the  
289 same protein family (*i.e.* src family kinases, SFKs). To test this, we measured the level  
290 of phosphorylation within the activation domain (amino acid 416) of SFKs, finding that  
291 RA reduced collagen induced phosphorylation of FYN as well as basal tyrosine  
292 phosphorylation of SFKs (Fig 6f). This indicates that RA perturbs the phospho-signaling  
293 networks that regulate platelet response to extracellular stimuli.

294 Altogether, these findings support our prediction that RA modulates platelet  
295 activation and function. It also supports the observation that its mechanism of action  
296 involves reduction of phosphorylation at the activation domain of the protein-tyrosine  
297 kinase FYN (Fig 6a) and the inhibition of general tyrosine phosphorylation. Finally, while  
298 polyphenols are usually associated to their antioxidant function, here we illustrate  
299 another mechanistic pathway through which they could benefit health.

300

## 301 **Discussion**

302

303 Here, we proposed a network-based framework to predict the therapeutic effects of  
304 dietary polyphenols in human diseases. We find that polyphenol protein targets cluster  
305 in specific functional neighborhoods of the interactome, and we show that the network  
306 proximity between polyphenol targets and disease proteins is predictive of the  
307 therapeutic effects of polyphenols. We demonstrate that diseases whose proteins are  
308 proximal to polyphenol targets tend to have significant changes in gene expression in  
309 cell lines treated with the respective polyphenol, while such changes are absent for  
310 diseases whose proteins are distal to polyphenol targets. Finally, we find that the  
311 network neighborhood around the RA targets and vascular disease proteins are related

312 to platelet function. We validate this mechanistic prediction by showing that RA  
313 modulates platelet function through inhibition of protein tyrosine phosphorylation. These  
314 observations suggest a role of RA on prevention of vascular diseases by inhibiting  
315 platelet activation and aggregation.

316 The observed results also suggest multiple avenues through which our ability to  
317 understand the role of polyphenols could be improved. First, some of the known health  
318 benefits of polyphenols might be caused not only by the native molecules, but also by  
319 their metabolic byproducts<sup>28,29</sup>. We, however, lack data about colonic degradation, liver  
320 metabolism, bioavailability, and interaction with proteins of specific polyphenols or their  
321 metabolic byproducts. Future experimental data on protein interactions with polyphenol  
322 byproducts and conjugates can be incorporated in the proposed framework, further  
323 improving the accuracy of our predictions. The lack of this data does not invalidate the  
324 findings presented here, since previous studies report the presence of unmetabolized  
325 polyphenols in blood<sup>30-32</sup>; and it has been hypothesized that, in some instances,  
326 deconjugation of liver metabolites occurs in specific tissues or cells<sup>33-35</sup>. Therefore, the  
327 lack of data for specific polyphenols and the fact that other mechanisms exist through  
328 which they can affect health (e.g. antioxidant activity, microbiota regulation) explain why  
329 this methodology might still miss a few known relationships between polyphenols and  
330 diseases. Second, considering that several experimental studies of polyphenol  
331 bioefficacy have been observed in *in vitro* and *in vivo* models, the proposed framework  
332 might help us interpret literature evidence, possibly even allowing us to exclude  
333 chemical candidates when considering the health benefits provided by a given food in  
334 epidemiological association studies.

335 Our assumption that network proximity recovers therapeutic associations is  
336 based on its predictive performance on a ground truth dataset for observed therapeutic  
337 effects and also relies on previous observations about the effect of drugs on  
338 diseases<sup>16,17,36</sup>. While the proposed methodology offers a powerful prioritization tool to  
339 guide future research, the real effect of polyphenols on diseases might still be negative,  
340 given other unmet factors such as dosage, comorbidities, and drug interactions, which  
341 can only be ruled out by pre-clinical and clinical studies. Gene expression perturbation  
342 profiles, such as the ones provided by the Connectivity map, can also be integrated with

343 network proximity to further highlight potential beneficial or harmful effects of chemical  
344 compounds<sup>37,38</sup>.

345 The low bioavailability of some polyphenols in food might still present challenges  
346 when considering the therapeutic utility of these molecules. However, 48 of the 65  
347 polyphenols we explored here are predicted to have high gastrointestinal absorption  
348 (Supplementary Table 2) and different methodologies are available to increase  
349 bioavailability of natural compounds<sup>39,40</sup>. Additionally, in the same way that the  
350 polyphenol phlorizin led to the discovery of new strategies for disease treatment  
351 resulting in the development of new compounds with higher efficacy<sup>41</sup>, we believe that  
352 the present methodology can help us identify polyphenol-based candidates for drug  
353 development.

354 The methodology introduced here offers a foundation for the mechanistic  
355 interpretation of alternative pathways through which polyphenols can affect health, e.g.,  
356 the combined effect of different polyphenols<sup>36,42</sup> and their interaction with drugs<sup>43</sup>. To  
357 address such synergistic effects, we need ground-truth data on these aspects. The  
358 developed methodology can be applied to other food-related chemicals, providing a  
359 framework by which to understand their health effects. Future research may help us  
360 also account for the way that food-related chemicals affect endogenous metabolic  
361 reactions, impacting not only signaling pathways, but also catabolic and anabolic  
362 processes. Finally, the methodology provides a framework to interpret and find causal  
363 support for associations identified in observational studies. Taken together, the  
364 proposed network-based framework has the potential to reveal systematically the  
365 mechanism of action underlying the health benefits of polyphenols, offering a logical,  
366 rational strategy for mechanism-based drug development of food-based compounds.

367

## 368 **Methods**

369

### 370 Building the Interactome

371

372 The human interactome was assembled from 16 databases containing different types of  
373 protein-protein interactions (PPIs): 1) binary PPIs tested by high-throughput yeast-two-

374 hybrid (Y2H) experiments<sup>44</sup>; 2) kinase-substrate interactions from literature-derived low-  
375 throughput and high-throughput experiments from KinomeNetworkX<sup>45</sup>, Human Protein  
376 Resource Database (HPRD)<sup>46</sup>, and PhosphositePlus<sup>47</sup>; 3) carefully literature-curated  
377 PPIs identified by affinity purification followed by mass spectrometry (AP-MS), and from  
378 literature-derived low-throughput experiments from InWeb<sup>48</sup>, BioGRID<sup>49</sup>, PINA<sup>50</sup>,  
379 HPRD<sup>51</sup>, MINT<sup>52</sup>, IntAct<sup>52</sup>, and InnateDB<sup>53</sup>; 4) high-quality PPIs from three-dimensional  
380 (3D) protein structures reported in Instruct<sup>54</sup>, Interactome3D<sup>55</sup>, and INSIDER<sup>56</sup>; 5)  
381 signaling networks from literature-derived low-throughput experiments as annotated in  
382 SignaLink2.0<sup>57</sup>; and 6) protein complex from BioPlex2.0<sup>58</sup>. The genes were mapped to  
383 their Entrez ID based on the National Center for Biotechnology Information (NCBI)  
384 database as well as their official gene symbols. The resulting interactome includes  
385 351,444 protein-protein interactions (PPIs) connecting 17,706 unique proteins  
386 (Supplementary Data 1). The largest connected component has 351,393 PPIs and  
387 17,651 proteins.

388

### 389 Polyphenols, Polyphenol Targets, and Disease Proteins

390

391 We retrieved 759 polyphenols from the PhenolExplorer database<sup>4</sup>. The database lists  
392 polyphenols with food composition data or profiled in biofluids after interventions with  
393 polyphenol-rich diets. For our analysis, we only considered polyphenols that: 1) could  
394 be mapped in PubChem IDs, 2) were listed in the Comparative Toxicogenomics (CTD)  
395 database<sup>59</sup> as having therapeutic effects on human diseases, and 3) had protein-  
396 binding information present in the STITCH database<sup>60</sup> with experimental evidence (Fig  
397 1a). After these steps, we considered a final list of 65 polyphenols, for which 598 protein  
398 targets were retrieved from STITCH (Supplementary Table 1). We considered 3,173  
399 disease proteins corresponding to 299 diseases retrieved from Menche *et al* (2015)<sup>15</sup>.  
400 Gene ontology enrichment analysis of protein targets was performed using the  
401 Bioconductor package clusterProfiler with a significance threshold of  $p < 0.05$  and  
402 Benjamini-Hochberg multiple testing correction with  $q < 0.05$ .

403

### 404 Polyphenol Disease Associations

405  
406 We retrieved the polyphenol-disease associations from the Comparative  
407 Toxicogenomics Database (CTD). We considered only manually curated associations  
408 labeled as therapeutic. By considering the hierarchical structure of diseases along the  
409 MeSH tree, we expanded explicit polyphenol-disease associations to include also  
410 implicit associations. This procedure was performed by propagating associations in the  
411 lower branches of the MeSH tree to consider diseases in the higher levels of the same  
412 tree branch. For example, a polyphenol associated with heart diseases would also be  
413 associated with the more general category of cardiovascular diseases. By performing  
414 this expansion, we obtained a final list of 1,525 known associations between the 65  
415 polyphenols and the 299 diseases considered in this study.

416

#### 417 Network Proximity Between Polyphenol Targets and Disease Proteins

418

419 The proximity between a disease and a polyphenol was evaluated using a distance  
420 metric that takes into account the shortest path lengths between polyphenol targets and  
421 disease proteins<sup>16</sup>. Given  $S$ , the set of disease proteins,  $T$ , the set of polyphenol targets,  
422 and  $d(s, t)$ , the shortest path length between nodes  $s$  and  $t$  in the network, we define:

423

$$424 \quad d_c(S, T) = \frac{1}{|T|} \sum_{t \in T} \min_{s \in S} d(s, t) \quad (1)$$

425 We also calculated a relative distance metric ( $Z_{d_c}$ ) that compares the absolute distance  
426  $d_c(S, T)$  between a disease and a polyphenol with a reference distribution describing the  
427 random expectation. The reference distribution corresponds to the expected distances  
428 between two randomly selected groups of proteins matching the size and degrees of the  
429 original disease proteins and polyphenol targets in the network. It was generated by  
430 calculating the proximity between these two randomly selected groups across 1,000  
431 iterations. The mean  $\mu_{d(S,T)}$  and standard deviation  $\sigma_{d(S,T)}$  of the reference distribution  
432 were used to convert the absolute distance  $d_c$  into the relative distance  $Z_{d_c}$ , defined as:

433

$$434 \quad Z_{d_c} = \frac{d_c - \mu_{d(S,T)}}{\sigma_{d(S,T)}} \quad (2)$$

435

436 We performed a degree-preserving random selection, but due to the scale-free nature  
437 of the human interactome, we avoid repeatedly choosing the same (high degree) nodes  
438 by using a binning approach in which nodes within a certain degree interval were  
439 grouped together such that there were at least 100 nodes in the bin. The  
440 Supplementary Data 2 reports the proximity scores  $d_c$  and  $Z_{d_c}$  for all pairs of diseases  
441 and polyphenols.

442

#### 443 Area Under ROC Curve Analysis

444

445 For each polyphenol, we used AUC to evaluate how well the network proximity  
446 distinguishes diseases with known therapeutic associations from all of the others of the  
447 set of 299 diseases. The set of known associations (therapeutic) retrieved from CTD  
448 were used as positive instances, all unknown associations were defined as negative  
449 instances, and the area under the ROC curve was computed using the implementation  
450 in the Scikit-learn Python package. Furthermore, we calculated 95% confidence  
451 intervals using the bootstrap technique with 2,000 resamplings with sample sizes of 150  
452 each. Considering that AUC provides an overall performance, we also searched for a  
453 metric to evaluate the top ranking predictions. For this analysis, we calculated the  
454 precision of the top 10 predictions, considering only the polyphenol-disease  
455 associations with relative distance  $Z_{d_c} < -0.5^{16}$ .

456

#### 457 Analysis of Network Proximity and Gene Expression Deregulation

458

459 We retrieved perturbation signatures from the Connectivity Map database  
460 (<https://clue.io/>) for the MCF7 cell line after treatment with 21 polyphenols. These  
461 signatures reflect the perturbation of the gene expression profile caused by the  
462 treatment with that particular polyphenol relative to a reference population, which  
463 comprises all other treatments in the same experimental plate<sup>26</sup>. For polyphenols having  
464 more than one experimental instance (time of exposure, cell line, dose), we selected the  
465 one with highest `distil_cc_q75` value (75th quantile of pairwise spearman correlations in

466 landmark genes, [https://clue.io/connectopedia/perturbagen\\\_types\\\_and\\\_controls](https://clue.io/connectopedia/perturbagen\_types\_and\_controls)). We  
467 performed Gene Set Enrichment Analysis<sup>61</sup> to evaluate the enrichment of disease  
468 genes among the top deregulated genes in the perturbation profiles. This analysis offers  
469 Enrichment Scores (ES) that have small values when genes are randomly distributed  
470 among the ordered list of expression values and high values when they are  
471 concentrated at the top or bottom of the list. The ES significance is calculated by  
472 creating 1,000 random selection of gene sets with the same size as the original set and  
473 calculating an empirical p-value by considering the proportion of random sets resulting  
474 in ES smaller than the original case. The p-values were adjusted for multiple testing  
475 using the Benjamini-Hochberg method. The network proximity  $d_c$  of disease proteins  
476 and polyphenol targets for diseases with significant ES were compared according to  
477 their therapeutic and unknown-therapeutic associations using the Student's t-test. The  
478 relevant code for calculating the network proximity, AUCs, and enrichment scores can  
479 be found on <https://github.com/italodovalle/polyphenols>.

480

#### 481 Platelet Isolation

482

483 Human blood collection was performed as previously described in accordance with the  
484 Declaration of Helsinki and ethics regulations with Institutional Review Board approval  
485 from Brigham and Women's Hospital (P001526). Healthy volunteers did not ingest  
486 known platelet inhibitors for at least 10 days prior. Citrated whole blood underwent  
487 centrifugation with a slow brake (177 x g, 20 minutes), and the PRP fraction was  
488 acquired for subsequent experiments. For washed platelets, PRP was incubated with 1  
489  $\mu$ M prostaglandin E<sub>1</sub> (Sigma, P5515) and immediately underwent centrifugation with a  
490 slow brake (1000 x g, 5 minutes). Platelet-poor plasma was aspirated, and pellets  
491 resuspended in platelet resuspension buffer (PRB; 10 mM Hepes, 140 mM NaCl, 3 mM  
492 KCl, 0.5 mM MgCl<sub>2</sub>, 5 mM NaHCO<sub>3</sub>, 10 mM glucose, pH 7.4).

493

#### 494 Platelet Aggregometry

495



496 Platelet aggregation was measured by turbidimetric aggregometry as previously  
497 described<sup>62</sup>. Briefly, PRP was pretreated with RA for 1 hour before adding 250  $\mu$ L to  
498 siliconized glass cuvettes containing magnetic stir bars. Samples were placed in  
499 Chrono-Log<sup>®</sup> Model 700 Aggregometers before the addition of various platelet agonists.  
500 Platelet aggregation was monitored for 6 minutes at 37°C with a stir speed of 1000 rpm  
501 and the maximum extend of aggregation recorded using AGGRO/LINK<sup>®</sup>8 software. In  
502 some cases, dense granule release was simultaneously recorded by supplementing  
503 samples with Chrono-Lume<sup>®</sup> (Chrono-Log<sup>®</sup>, 395) according to the manufacturer's  
504 instructions.

505

#### 506 Platelet Alpha Granule Secretion and Integrin $\alpha_{IIb}\beta_3$ Activation

507

508 Changes in platelet surface expression of P-selectin (CD62P) or binding of Alexa  
509 Fluor<sup>™</sup> 488-conjugated fibrinogen were used to assess alpha granule secretion and  
510 integrin  $\alpha_{IIb}\beta_3$  activation, respectively. First, PRP was pre-incubated with RA for 1 hour,  
511 followed by stimulation with various platelet agonists under static conditions at 37°C for  
512 20 minutes. Samples were then incubated with APC-conjugated anti-human CD62P  
513 antibodies (BioLegend<sup>®</sup>, 304910) and 100  $\mu$ g/mL Alexa Fluor<sup>™</sup> 488-Fibrinogen (Thermo  
514 Scientific<sup>™</sup>, F13191) for 20 minutes before fixation in 2% [v/v] paraformaldehyde  
515 (Thermo Scientific<sup>™</sup>, AAJ19945K2). Fifty thousand platelets were processed per  
516 sample using a Cytex<sup>™</sup> Aurora spectral flow cytometer. Percent-positive cells were  
517 determined by gating on fluorescence intensity compared to unstimulated samples.

518

#### 519 Platelet Cytotoxicity

520

521 Cytotoxicity were tested by measuring lactate dehydrogenase (LDH) release by  
522 permeabilized platelets into the supernatant<sup>63</sup>. Briefly, washed platelets were treated  
523 with various concentrations of RA for 1 hour, before isolating supernatants via  
524 centrifugation (15,000 x g, 5 min). A Pierce LDH Activity Kit (Thermo Scientific<sup>™</sup>,  
525 88953) was then used to assess supernatant levels of LDH.

526

527 Immunoprecipitation and Western blot

528

529 Washed platelets were pre-treated with RA for 1 hour, followed by a 15 minute  
530 treatment with Eptifibatide (50  $\mu$ M). Platelets were then stimulated with various agonists  
531 for 5 minutes under stirring conditions (1000 rpm, 37°C). Platelets were lysed on ice  
532 with RIPA Lysis Buffer System<sup>®</sup> (Santa Cruz<sup>®</sup>, sc-24948) and supernatants clarified via  
533 centrifugation (15,000 x g, 10 min, 4°C). For immunoprecipitation of FYN, lysates were  
534 first precleared of IgG by incubating with Protein A agarose beads (Cell Signaling  
535 Technologies, 9863S) for 30 minutes at 4°C, before isolation of the supernatant via  
536 centrifugation (15,000 x g, 10 min, 4°C). Supernatants were incubated with anti-FYN  
537 antibodies (Abcam, 2A10) overnight at 4°C before incubation with Protein A beads for 1  
538 hour. Beads were then washed 5 times with NP-40 lysis buffer (144 mM Tris, 518 mM  
539 NaCl, 6 mM EDTA, 12 mM Na<sub>2</sub>VO<sub>3</sub>, 33.3% [v/v] NP-40, Halt<sup>™</sup> protease inhibitor  
540 cocktail (Thermo, 78429)).

541 For Western Blot analysis, total cell lysates or immunoprecipitated FYN were  
542 reduced with Laemmli Sample Buffer (Bio-Rad, 1610737) and proteins separated by  
543 molecular weight in PROTEAN TGX<sup>™</sup> precast gels (Bio-Rad, 4561084). Proteins were  
544 transferred to PVDF membranes (Bio-Rad, 1620174) and probed with either 4G10  
545 (Millipore, 05-321), a primary antibody clone that recognizes phosphorylated tyrosine  
546 residues, or primary antibodies that probe for the site-specific phosphorylation of src  
547 family kinases (SFks, p-Tyr416) within their activation loop. Membranes were incubated  
548 with horseradish peroxidase-conjugated secondary antibodies (Cell Signaling  
549 Technologies, 7074S) to catalyze an electrochemiluminescent reaction (Thermo  
550 Scientific<sup>™</sup>, PI32109). Membranes were visualized using a Bio-Rad ChemiDoc Imaging  
551 System and densitometric analysis of protein lanes conducted using ImageJ (NIH,  
552 Version 1.52a).

553

554 **Author Contributions**

555

556 I.F.V and A.L.B designed the study. I.F.V. performed all computational analyses. H.G.R,  
557 M.W.M., E.B., and J.L designed and performed experimental validation. J.L. guided

558 I.F.V. on validation case studies. S.M and D.B guided I.F.V for data interpretation and  
559 curation of disease associations obtained from literature. I.F.V and A.L.B wrote the  
560 paper with input from all authors. All authors read and approved the manuscript.

561

## 562 **Acknowledgements**

563

564 This study was supported, in part, by NIH grant 1P01HL132825, HG007690, HL108630,  
565 and HL119145; American Heart Association grants 151708 and D700382; and ERC  
566 grant 810115-DYNASET. We would like to thank Peter Ruppert, Giulia Menichetti, and  
567 Istvan Kovacs for support in this study, Feixiong Cheng for assembling the Human  
568 Interactome, and Alice Grishchenko for help with data visualization.

569

## 570 **Declaration of Interests**

571

572 J.L. and A.L.B are co-scientific founder of Scipher Medicine, Inc., which applies network  
573 medicine strategies to biomarker development and personalized drug selection. A.L.B is  
574 the founder of Nomix Inc. and Foodome, Inc. that apply data science to health; I.F.V is a  
575 scientific consultant for Foodome, Inc.

576

## 577 **Data Availability**

578

579 The authors declare that all data supporting the findings of this study are available at  
580 <https://github.com/italodovalle/polyphenols> and within the paper and its supplementary  
581 information files.

582

## 583 **Code Availability**

584

585 Computer code is available at <https://github.com/italodovalle/polyphenols>

586

587

588 **Table 1 – Top 20 Predicted Therapeutic Associations Between EGCG and Human**  
 589 **Diseases.** Diseases were ordered according to the network distance ( $d_c$ ) of their  
 590 proteins to EGCG targets and diseases with relative distance  $Z_{dc} > -0.5$  were removed.  
 591 References reported in CTD for curated ‘therapeutic associations’ are shown.  
 592

| Disease                            | Distance $d_c$ | Significance $Z_{dc}$ | Known Therapeutic Effect<br>(References) |
|------------------------------------|----------------|-----------------------|------------------------------------------|
| nervous system diseases            | 1.13           | -1.72                 | 64,65                                    |
| nutritional and metabolic diseases | 1.25           | -1.45                 | 23                                       |
| metabolic diseases                 | 1.25           | -1.41                 | 23                                       |
| cardiovascular diseases            | 1.27           | -2.67                 | 66–71                                    |
| immune system diseases             | 1.29           | -1.31                 | 72                                       |
| vascular diseases                  | 1.33           | -3.47                 | 66,67,70                                 |
| digestive system diseases          | 1.33           | -1.57                 | 73–77                                    |
| neurodegenerative diseases         | 1.37           | -1.71                 | 78                                       |
| central nervous system diseases    | 1.41           | -0.54                 | 78                                       |
| autoimmune diseases                | 1.41           | -1.30                 | 72                                       |
| gastrointestinal diseases          | 1.43           | -1.02                 | 79                                       |
| brain diseases                     | 1.43           | -0.89                 | NA                                       |
| intestinal diseases                | 1.49           | -1.08                 | 79                                       |
| inflammatory bowel diseases        | 1.54           | -2.10                 | NA                                       |
| bone diseases                      | 1.54           | -1.18                 | NA                                       |
| gastroenteritis                    | 1.54           | -1.92                 | NA                                       |
| demyelinating diseases             | 1.54           | -1.78                 | NA                                       |
| glucose metabolism disorders       | 1.54           | -1.58                 | 23                                       |
| heart diseases                     | 1.56           | -1.20                 | 68,69,71                                 |
| diabetes mellitus                  | 1.56           | -1.66                 | 23                                       |

593

594 **Table 2 – Top Ranked Polyphenols.** Polyphenols for which network proximity to  
 595 diseases best predicts their therapeutic effects. Table showing polyphenols with AUC >  
 596 0.6 and Precision > 0.6. (\*) Confidence intervals calculated with 2,000 bootstraps with  
 597 replacement and sample size of 50% of the diseases (150/299). (\*\*) Precision was  
 598 calculated based on the top 10 polyphenols after their ranking based on the distance  
 599 ( $d_c$ ) of their targets to the disease proteins and considering only predictions with Z-score  
 600 < -0.5.(\*\*\*) Concentrations of polyphenols in blood were retrieved from the Human  
 601 Metabolome Database (HMDB)

| Polyphenol                       | AUC  | AUC CI*       | Precision** | Concentration in Blood*** | N Mapped Targets | LCC Size |
|----------------------------------|------|---------------|-------------|---------------------------|------------------|----------|
| Coumarin                         | 0.93 | [0.86 - 0.98] | 0.6         |                           | 7                | 1        |
| Piceatannol                      | 0.86 | [0.77 - 0.94] | 0.6         |                           | 39               | 23       |
| Genistein                        | 0.82 | [0.75 - 0.89] | 0.7         | [0.006 - 0.525 uM]        | 18               | 6        |
| Ellagic acid                     | 0.79 | [0.63 - 0.92] | 0.6         |                           | 42               | 19       |
| (-)-epigallocatechin 3-O-gallate | 0.78 | [0.70 - 0.86] | 0.8         |                           | 51               | 17       |
| Isoliquiritigenin                | 0.75 | [0.77 - 0.94] | 0.6         |                           | 10               | 8        |
| Resveratrol                      | 0.75 | [0.66 - 0.82] | 1           |                           | 63               | 25       |
| Pterostilbene                    | 0.73 | [0.61 - 0.84] | 0.6         |                           | 5                | 2        |
| Quercetin                        | 0.73 | [0.64 - 0.81] | 1           | [0.022 - 0.080 uM]        | 216              | 140      |
| (-)-epicatechin                  | 0.65 | [0.49 - 0.80] | 0.8         | 0.625 uM                  | 11               | 3        |

602

603

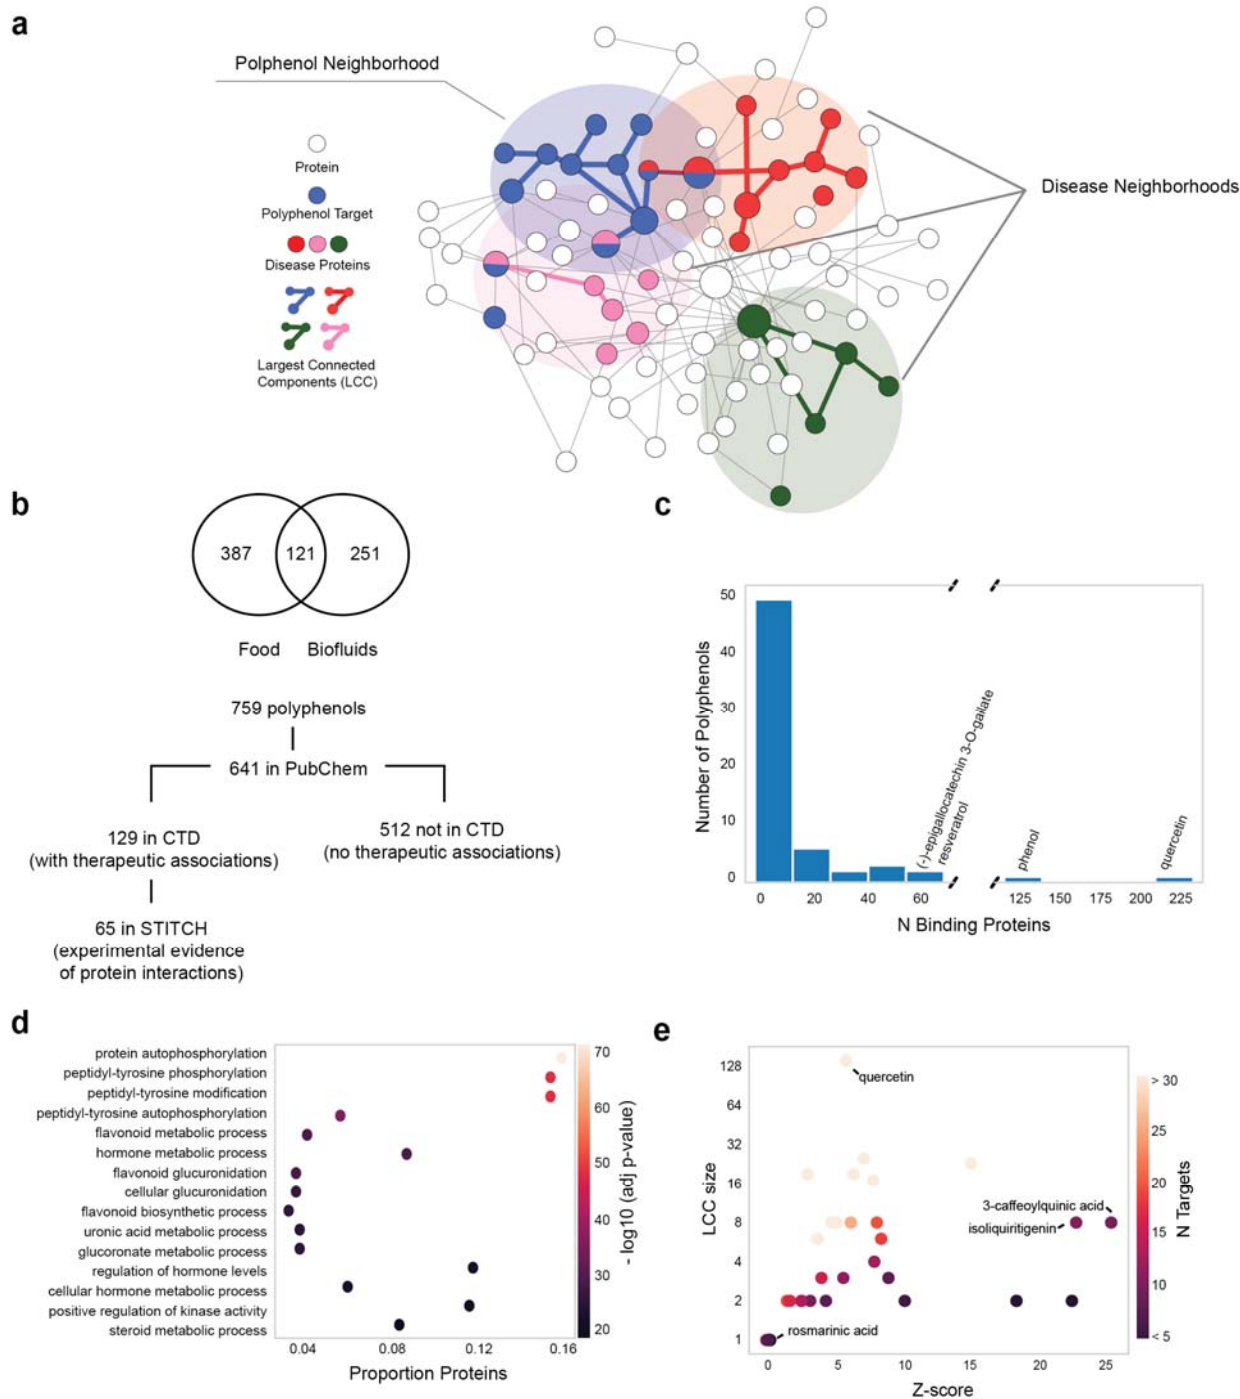

604

605 **Figure 1 – Properties of Polyphenol Protein Targets.** (A) Schematic representation of the human  
 606 interactome, highlighting regions where polyphenol targets and disease proteins are localized. (B)  
 607 Diagram showing the selection criteria of the polyphenols evaluated in this study. (C) Distribution of the  
 608 number of polyphenol protein targets mapped to the human interactome. (D) Top ( $n=15$ ) enriched GO  
 609 terms (Biological Process) among all polyphenol protein targets. The X-axis shows the proportion of  
 610 targets mapped to each pathway. (E) Size of the Largest Connected Component (LCC) formed by the  
 611 targets of each polyphenol in the interactome and the corresponding significance (z-score).  
 612

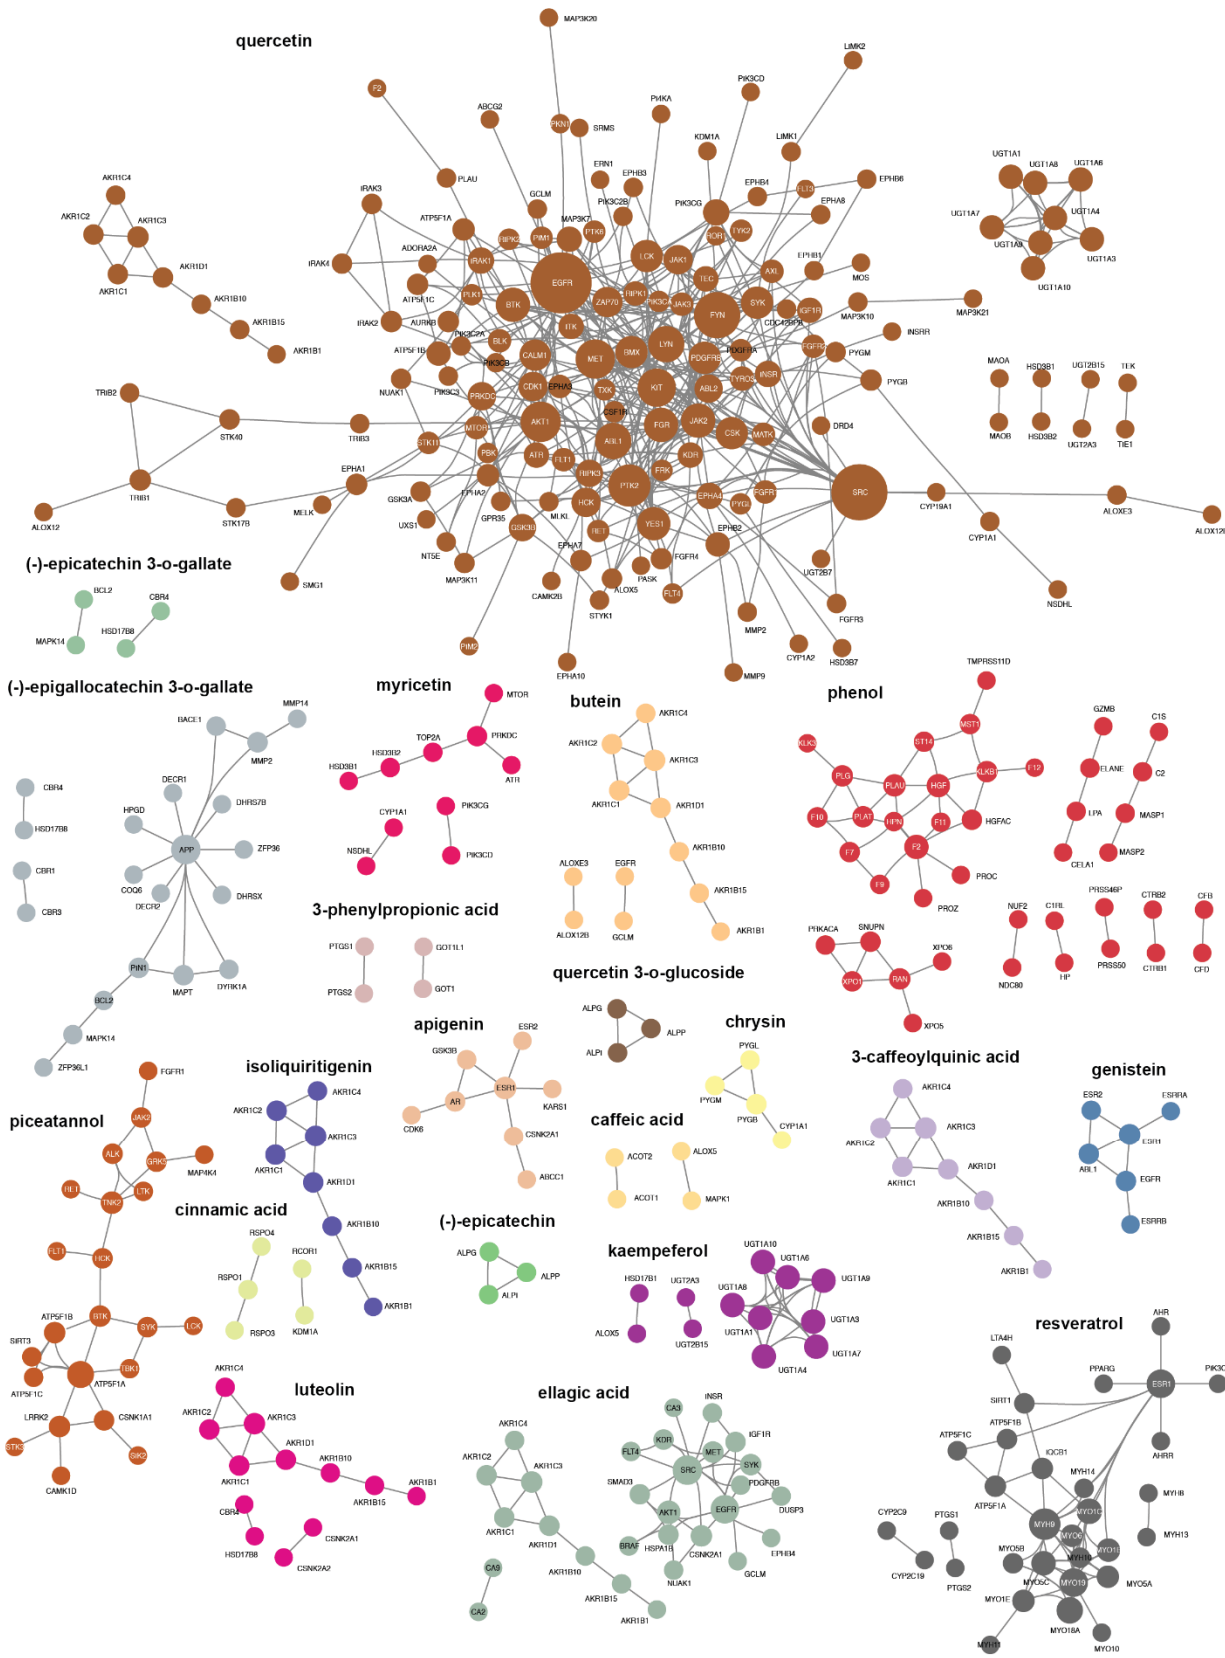

614 **Figure 2 – Protein-Protein Interactions of Polyphenol Targets.** The 23 polyphenols whose targets  
 615 form connected components in the interactome and their respective subgraphs. For example, piceatannol  
 616 targets form a unique connected component of 23 proteins, while quercetin targets form multiple  
 617 connected components, the largest with 140 proteins. Polyphenol targets that are not connected to any  
 618 other target are not shown in the figure. Colors distinguish connected component of different polyphenols.  
 619

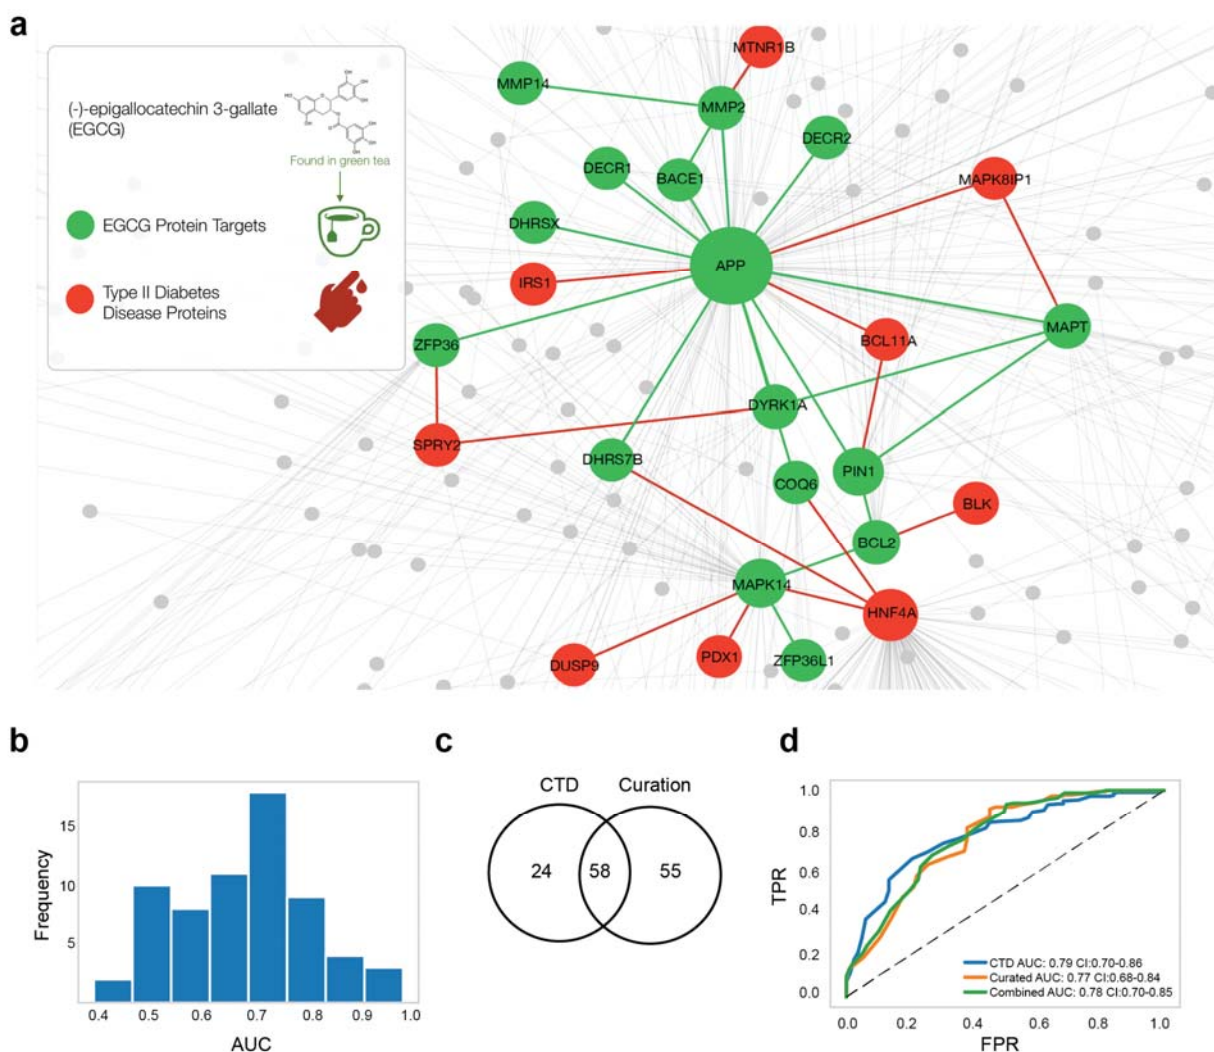

620  
 621 **Figure 3 – Proximity Between Polyphenol Targets and Disease Proteins is Predictive of**  
 622 **Therapeutic Effects of the Polyphenol.** (a) Interactome neighborhood showing the EGCG protein  
 623 targets and their interactions with type 2 diabetes (T2D)-associated proteins. (b) Distribution of AUC  
 624 values considering the predictions of therapeutic effects for 65 polyphenols. (c) Comparison of the EGCG-  
 625 disease associations considering the CTD database and the in-house database derived from the manual  
 626 curation of the literature. (d) Comparison of the prediction performance when considering known EGCG-  
 627 disease associations from the CTD, in-house manually curated database, or combined datasets.  
 628



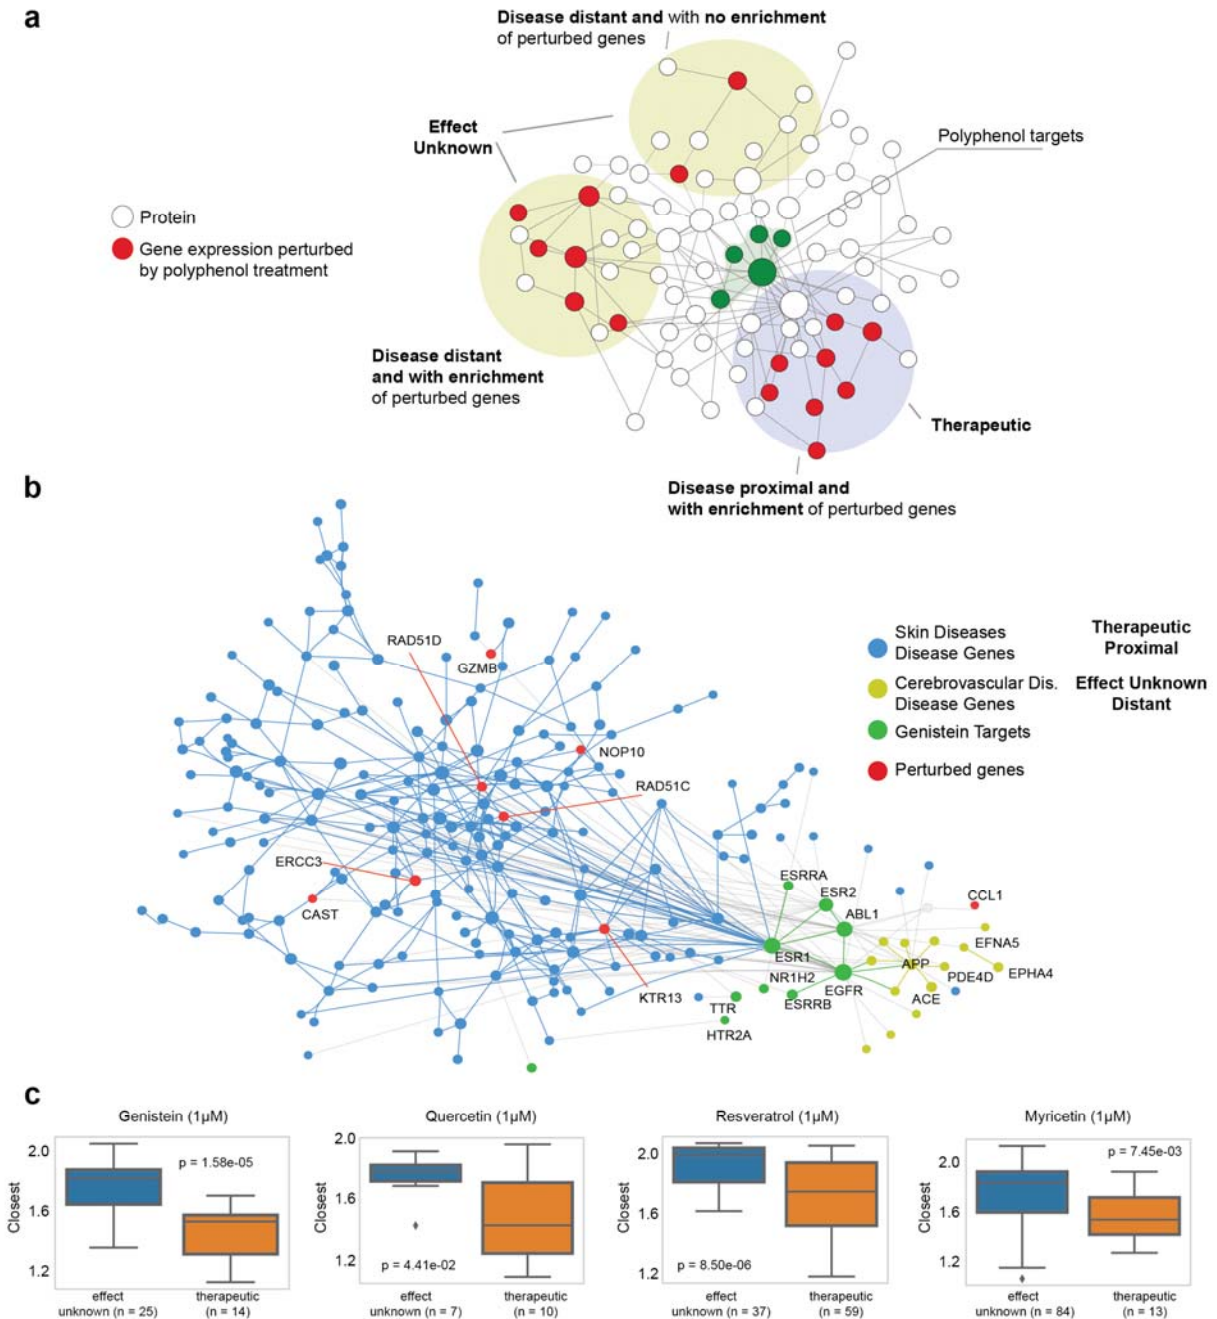

629  
 630 **Figure 4 – Relationships among Gene Expression Perturbation, Network Proximity, and**  
 631 **Therapeutic Effects of Polyphenols on Diseases.** (a) Schematic representation of the relationship  
 632 between the extent to which a polyphenol perturbs disease genes expression, its proximity to the disease  
 633 genes, and its therapeutic effects. (b) Interactome neighborhood showing the modules of skin diseases  
 634 (SD), genistein, and cerebrovascular disorders (CD). The SD module has 10 proteins with high  
 635 perturbation scores (>2) in the treatment of the MCF7 cell line with 1 µM of genistein. Genes associated  
 636 to SD are significantly enriched among the most differentially expressed genes, and the maximum  
 637 perturbation score among disease genes is higher in SD than CD. (c) Among the diseases in which  
 638 genes are enriched with highly perturbed genes, those with therapeutic associations show smaller  
 639 network distances to the polyphenol targets than those without. The same trend is observed in treatments  
 640 of the polyphenols quercetin, resveratrol, and myricetin.  
 641

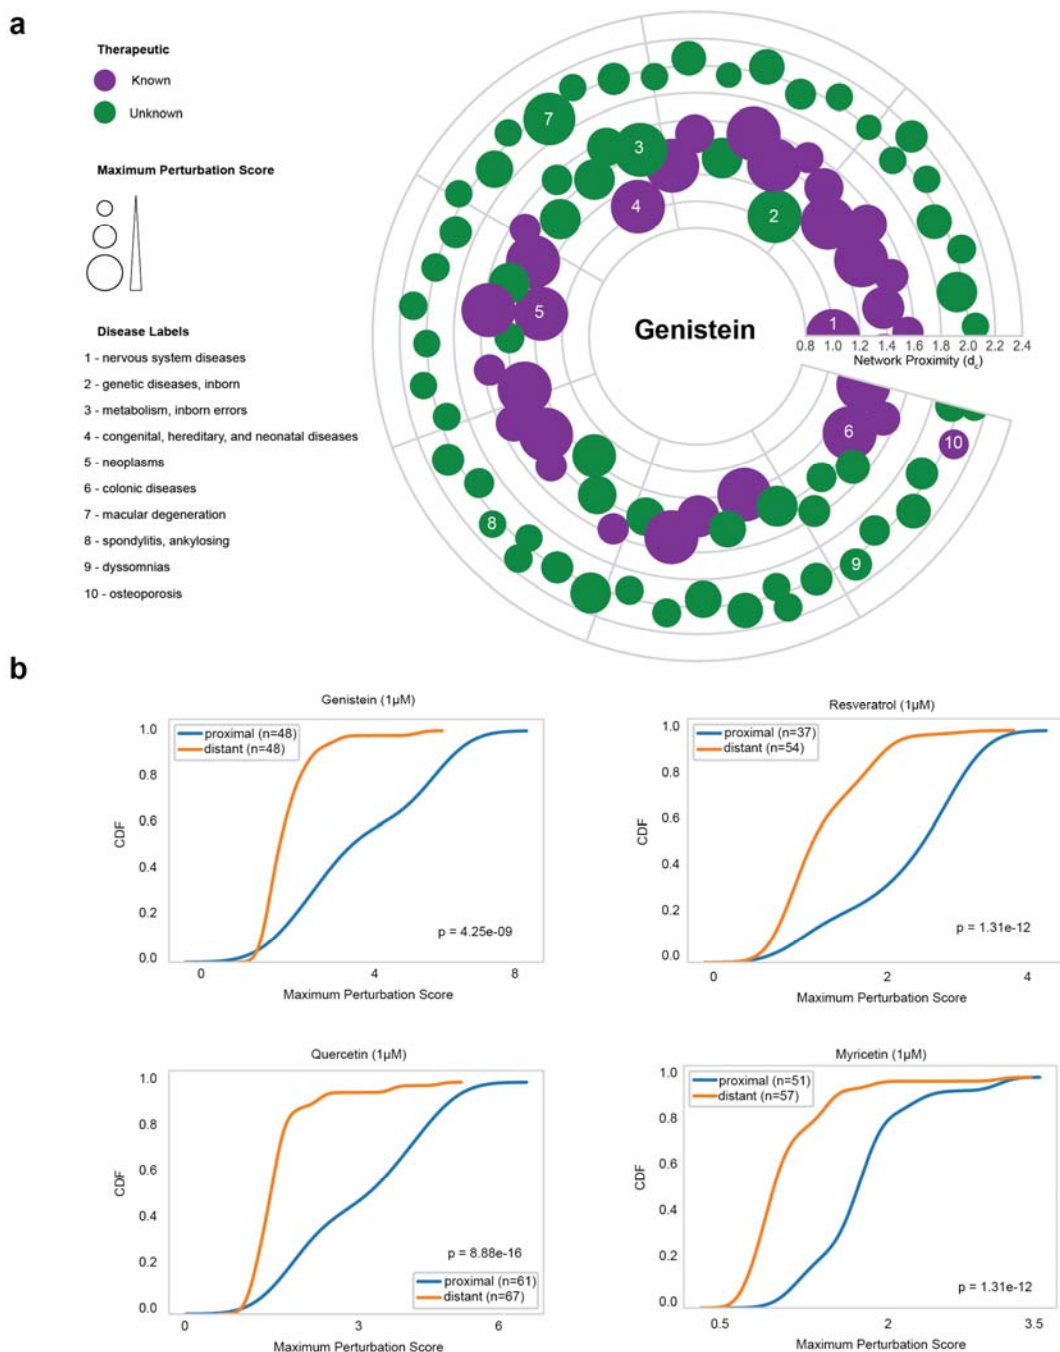

642

643 **Figure 5 – Diseases Proximal to Polyphenol Targets Have Higher Gene Expression Perturbation**  
 644 **Profiles.** (a) Proximal and distal diseases in relation to genistein targets. Each node represents a disease  
 645 and the node size is proportional to the perturbation score after treatment with genistein (1  $\mu$ M, 6 hours).  
 646 Distance from the origin represents the network proximity ( $d_c$ ) to genistein targets. Purple nodes represent  
 647 diseases in which the therapeutic association was previously known. (c) Cumulative distribution of the  
 648 maximum perturbation scores of genes from diseases that are distal or proximal to polyphenol targets  
 649 considering different polyphenols (1  $\mu$ M, 6 hours): genistein, quercetin, resveratrol, and myricetin.  
 650 Statistical significance was evaluated with the Kolmogorov-Smirnov test.

651

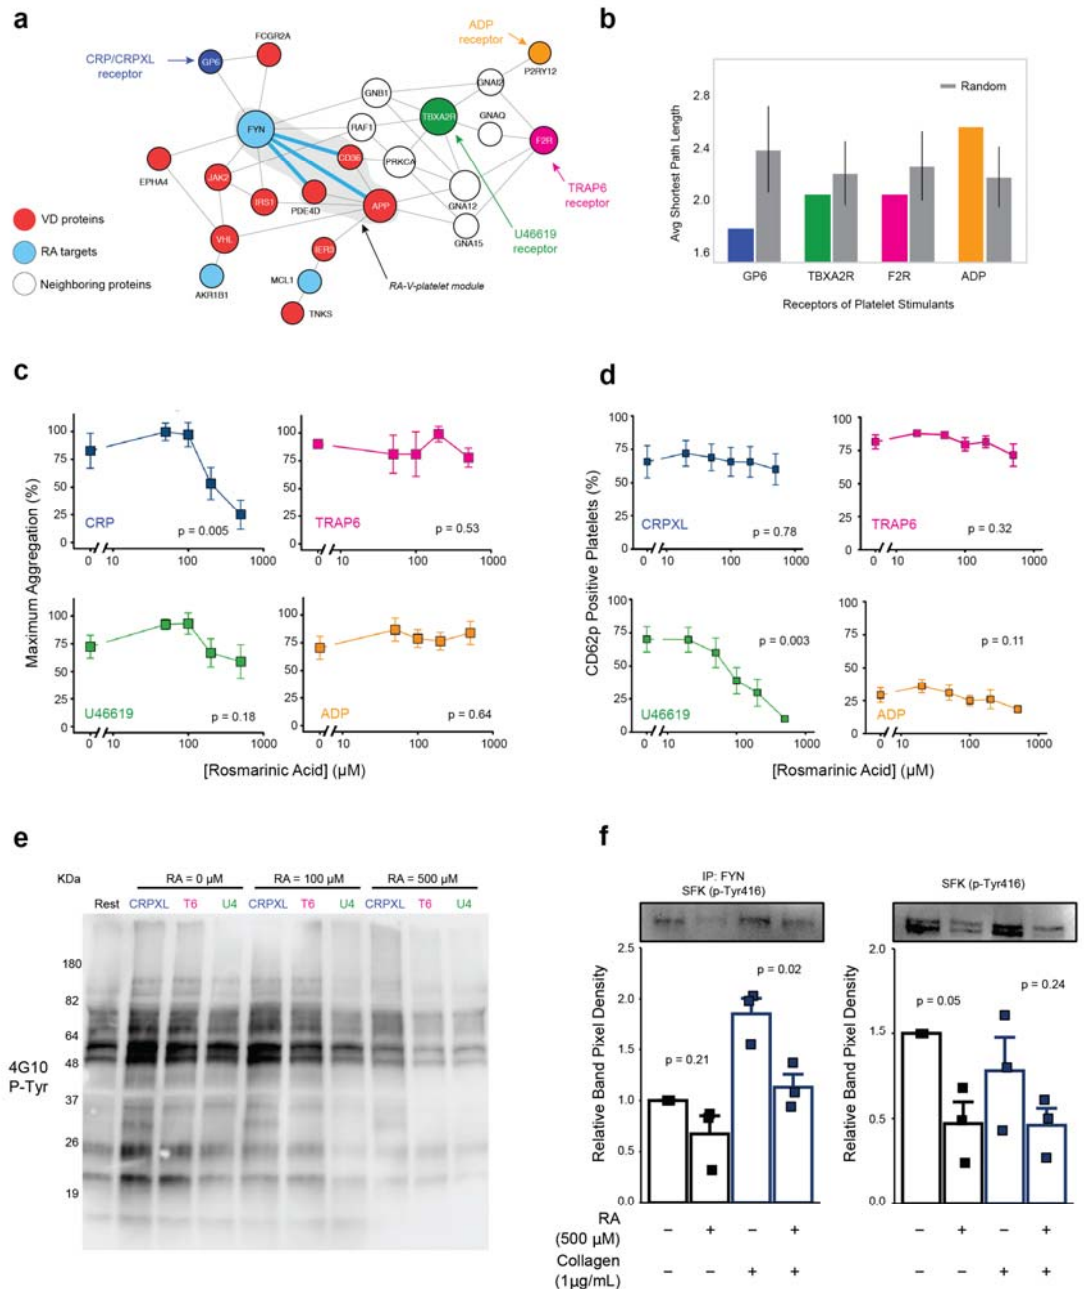

652

653 **Figure 6 – Rosmarinic Acid Modulates Platelet Function.** (a) Interactome neighborhood showing  
 654 rosmarinic acid (RA) targets and the RA-V-platelet module - the connected component formed by the RA  
 655 target FYN and the V proteins associated with platelet function PDE4D, CD36, and APP – and the  
 656 receptor for platelet agonists used in our experiments (collagen/CRPXL, TRAP6, U46619, and ADP). (b)  
 657 Average shortest path length from each platelet agonist receptor and the RA-V-platelet module formed by  
 658 the proteins FYN, PDE4D, CD36, APP. Bars represent standard deviation of that same measure over  
 659 1000 iterations of random selection of nodes in a degree preserving fashion. c-e) Platelet-rich plasma  
 660 (PRP) or washed platelets were pre-treated with RA for 1 hour before stimulation with either collagen (1  
 661 μg/mL), collagen-related peptide (CRP-XL, 1μg/mL), thrombin receptor activator peptide-6 (TRAP-6, 20  
 662 μM), U46619 (1 μM), or ADP (10 μM). Platelets were assessed for either (c) aggregation, (d) alpha

663 granule secretion. Platelet lysates were also probed for either (e) non-specific tyrosine phosphorylation  
664 (p-Tyr) of the whole cell lysate, or (d) site-specific phosphorylation of src family kinases (SFKs) and FYN  
665 at residue 416. n = 3-6 separate blood donations, mean +/- SEM. p-values in (c) and (d) were determined  
666 by Kruskal-Wallis test and by unpaired t.tests in (f).  
667

668   References

669

- 670   1.    Khera, A. V. *et al.* Genetic Risk, Adherence to a Healthy Lifestyle, and Coronary  
671       Disease. *N. Engl. J. Med.* **375**, 2349–2358 (2016).
- 672   2.    Arts, I. C. W. & Hollman, P. C. H. Polyphenols and disease risk in epidemiologic  
673       studies. *Am. J. Clin. Nutr.* **81**, 317S-325S (2005).
- 674   3.    Wang, X., Ouyang, Y. Y., Liu, J. & Zhao, G. Flavonoid intake and risk of CVD: A  
675       systematic review and meta-analysis of prospective cohort studies. *Br. J. Nutr.*  
676       **111**, 1–11 (2014).
- 677   4.    Neveu, V. *et al.* Phenol-Explorer: an online comprehensive database on  
678       polyphenol contents in foods. *Database* **2010**, bap024–bap024 (2010).
- 679   5.    Pérez-Jiménez, J., Neveu, V., Vos, F. & Scalbert, A. Systematic analysis of the  
680       content of 502 Polyphenols in 452 foods and beverages: An application of the  
681       phenol-explorer database. *J. Agric. Food Chem.* **58**, 4959–4969 (2010).
- 682   6.    Zhang, H. & Tsao, R. Dietary polyphenols, oxidative stress and antioxidant and  
683       anti-inflammatory effects. *Curr. Opin. Food Sci.* (2016)  
684       doi:10.1016/j.cofs.2016.02.002.
- 685   7.    Boly, R. *et al.* Quercetin inhibits a large panel of kinases implicated in cancer cell  
686       biology. *Int. J. Oncol.* **38**, 833–842 (2011).
- 687   8.    Lacroix, S. *et al.* A computationally driven analysis of the polyphenol-protein  
688       interactome. *Sci. Rep.* **8**, 2232 (2018).
- 689   9.    Hanhineva, K. *et al.* Impact of dietary polyphenols on carbohydrate metabolism.  
690       *Int. J. Mol. Sci.* **11**, 1365–402 (2010).
- 691   10.   Hervert-Hernández, D. & Goñi, I. Dietary polyphenols and human gut microbiota:  
692       A review. *Food Rev. Int.* **27**, 154–169 (2011).
- 693   11.   Zhang, S. *et al.* Dietary pomegranate extract and inulin affect gut microbiome  
694       differentially in mice fed an obesogenic diet. *Anaerobe* **48**, 184–193 (2017).
- 695   12.   Thazhath, S. S. *et al.* Administration of resveratrol for 5 wk has no effect on  
696       glucagon-like peptide 1 secretion, gastric emptying, or glycemic control in type 2  
697       diabetes: a randomized controlled trial. *Am. J. Clin. Nutr.* **103**, 66–70 (2016).
- 698   13.   Bhatt, J. K., Thomas, S. & Nanjan, M. J. Resveratrol supplementation improves

- 699 glycemic control in type 2 diabetes mellitus. *Nutr. Res.* **32**, 537–41 (2012).
- 700 14. Sharma, A. *et al.* A disease module in the interactome explains disease  
701 heterogeneity, drug response and captures novel pathways and genes in asthma.  
702 *Hum. Mol. Genet.* **24**, 3005–3020 (2014).
- 703 15. Menche, J. *et al.* Disease networks. Uncovering disease-disease relationships  
704 through the incomplete interactome. *Science* **347**, 1257601 (2015).
- 705 16. Guney, E., Menche, J., Vidal, M. & Barabási, A.-L. Network-based in silico drug  
706 efficacy screening. *Nat. Commun.* **7**, 10331 (2016).
- 707 17. Cheng, F. *et al.* Network-based approach to prediction and population-based  
708 validation of in silico drug repurposing. *Nat. Commun.* **9**, 1–12 (2018).
- 709 18. Kovács, I. A. *et al.* Network-based prediction of protein interactions. *Nat.*  
710 *Commun.* **10**, 1240 (2019).
- 711 19. Sarkar, F. H., Li, Y., Wang, Z. & Kong, D. Cellular signaling perturbation by  
712 natural products. *Cell. Signal.* **21**, 1541–7 (2009).
- 713 20. Iso, H. *et al.* The relationship between green tea and total caffeine intake and risk  
714 for self-reported type 2 diabetes among Japanese adults. *Ann. Intern. Med.* **144**,  
715 554–62 (2006).
- 716 21. Song, Y., Manson, J. E., Buring, J. E., Sesso, H. D. & Liu, S. Associations of  
717 dietary flavonoids with risk of type 2 diabetes, and markers of insulin resistance  
718 and systemic inflammation in women: a prospective study and cross-sectional  
719 analysis. *J. Am. Coll. Nutr.* **24**, 376–84 (2005).
- 720 22. Keske, M. A. *et al.* Vascular and metabolic actions of the green tea polyphenol  
721 epigallocatechin gallate. *Curr. Med. Chem.* **22**, 59–69 (2015).
- 722 23. Wolfram, S. *et al.* Epigallocatechin gallate supplementation alleviates diabetes in  
723 rodents. *J. Nutr.* **136**, 2512–8 (2006).
- 724 24. Muthu, R., Selvaraj, N. & Vaiyapuri, M. Anti-inflammatory and proapoptotic effects  
725 of umbelliferone in colon carcinogenesis. *Hum. Exp. Toxicol.* **35**, 1041–54 (2016).
- 726 25. Muthu, R. & Vaiyapuri, M. Synergistic and individual effects of umbelliferone with  
727 5-fluorouracil on tumor markers and antioxidant status of rat treated with 1,2-  
728 dimethylhydrazine. *Biomed. Aging Pathol.* **3**, 219–227 (2013).
- 729 26. Subramanian, A. *et al.* A Next Generation Connectivity Map: L1000 Platform and

- 730 the First 1,000,000 Profiles. *Cell* **171**, 1437-1452.e17 (2017).
- 731 27. Grover, S. P., Bergmeier, W. & Mackman, N. Platelet Signaling Pathways and  
732 New Inhibitors. *Arterioscler. Thromb. Vasc. Biol.* **38**, e28–e35 (2018).
- 733 28. Moco, S., Martin, F. P. J. & Rezzi, S. Metabolomics view on gut microbiome  
734 modulation by polyphenol-rich foods. *J. Proteome Res.* **11**, 4781–4790 (2012).
- 735 29. van Duynhoven, J. *et al.* Metabolic fate of polyphenols in the human  
736 superorganism. *Proc. Natl. Acad. Sci.* **108**, 4531–4538 (2011).
- 737 30. Ottaviani, J. I., Heiss, C., Spencer, J. P. E., Kelm, M. & Schroeter, H.  
738 Recommending flavanols and procyanidins for cardiovascular health: Revisited.  
739 *Mol. Aspects Med.* **61**, 63–75 (2018).
- 740 31. Stalmach, A., Troufflard, S., Serafini, M. & Crozier, A. Absorption, metabolism and  
741 excretion of Choleadi green tea flavan-3-ols by humans. *Mol. Nutr. Food Res.*  
742 (2009) doi:10.1002/mnfr.200800169.
- 743 32. Meng, X. *et al.* Identification and characterization of methylated and ring-fission  
744 metabolites of tea catechins formed in humans, mice, and rats. *Chem. Res.*  
745 *Toxicol.* (2002) doi:10.1021/tx010184a.
- 746 33. Perez-Vizcaino, F., Duarte, J. & Santos-Buelga, C. The flavonoid paradox:  
747 Conjugation and deconjugation as key steps for the biological activity of  
748 flavonoids. *J. Sci. Food Agric.* **92**, 1822–1825 (2012).
- 749 34. Shimoi, K. & Nakayama, T. Glucuronidase deconjugation in inflammation.  
750 *Methods Enzymol.* **400**, 263–272 (2005).
- 751 35. Kaneko, A. *et al.* Glucuronides of phytoestrogen flavonoid enhance macrophage  
752 function via conversion to aglycones by  $\beta$ -glucuronidase in macrophages. *Immun.*  
753 *Inflamm. Dis.* **5**, 265–279 (2017).
- 754 36. Cheng, F., Kovács, I. A. & Barabási, A.-L. Network-based prediction of drug  
755 combinations. *Nat. Commun.* **10**, 1197 (2019).
- 756 37. Smalley, J. L., Gant, T. W. & Zhang, S.-D. Application of connectivity mapping in  
757 predictive toxicology based on gene-expression similarity. *Toxicology* **268**, 143–  
758 146 (2010).
- 759 38. Lamb, J. *et al.* The Connectivity Map: using gene-expression signatures to  
760 connect small molecules, genes, and disease. *Science* **313**, 1929–35 (2006).

- 761 39. Amanzadeh, E. *et al.* Quercetin conjugated with superparamagnetic iron oxide  
762 nanoparticles improves learning and memory better than free quercetin via  
763 interacting with proteins involved in LTP. *Sci. Rep.* **9**, 1–19 (2019).
- 764 40. Shaikh, J., Ankola, D. D., Beniwal, V., Singh, D. & Kumar, M. N. V. R.  
765 Nanoparticle encapsulation improves oral bioavailability of curcumin by at least 9-  
766 fold when compared to curcumin administered with piperine as absorption  
767 enhancer. *Eur. J. Pharm. Sci.* **37**, 223–30 (2009).
- 768 41. Chao, E. C. & Henry, R. R. SGLT2 inhibition-A novel strategy for diabetes  
769 treatment. *Nat. Rev. Drug Discov.* **9**, 551–559 (2010).
- 770 42. Caldera, M. *et al.* Mapping the perturbome network of cellular perturbations. *Nat.*  
771 *Commun.* **10**, (2019).
- 772 43. Jensen, K., Ni, Y., Panagiotou, G. & Kouskoumvekaki, I. Developing a Molecular  
773 Roadmap of Drug-Food Interactions. *PLoS Comput. Biol.* **11**, 1–15 (2015).
- 774 44. Rolland, T. *et al.* A proteome-scale map of the human interactome network. *Cell*  
775 **159**, 1212–1226 (2014).
- 776 45. Cheng, F., Jia, P., Wang, Q. & Zhao, Z. Quantitative network mapping of the  
777 human kinome interactome reveals new clues for rational kinase inhibitor  
778 discovery and individualized cancer therapy. *Oncotarget* **5**, 3697–710 (2014).
- 779 46. Calçada, D. *et al.* The role of low-grade inflammation and metabolic flexibility in  
780 aging and nutritional modulation thereof: A systems biology approach. *Mech.*  
781 *Ageing Dev.* (2014) doi:10.1016/j.mad.2014.01.004.
- 782 47. Hornbeck, P. V *et al.* PhosphoSitePlus, 2014: mutations, PTMs and  
783 recalibrations. *Nucleic Acids Res.* **43**, D512-20 (2015).
- 784 48. Li, T. *et al.* A scored human protein-protein interaction network to catalyze  
785 genomic interpretation. *Nat. Methods* **14**, 61–64 (2016).
- 786 49. Chatr-Aryamontri, A. *et al.* The BioGRID interaction database: 2017 update.  
787 *Nucleic Acids Res.* **45**, D369–D379 (2017).
- 788 50. Cowley, M. J. *et al.* PINA v2.0: mining interactome modules. *Nucleic Acids Res.*  
789 **40**, D862-5 (2012).
- 790 51. Peri, S. *et al.* Human protein reference database as a discovery resource for  
791 proteomics. *Nucleic Acids Res.* **32**, D497-501 (2004).



- 792 52. Orchard, S. *et al.* The MIntAct project--IntAct as a common curation platform for  
793 11 molecular interaction databases. *Nucleic Acids Res.* **42**, D358-63 (2014).
- 794 53. Breuer, K. *et al.* InnateDB: systems biology of innate immunity and beyond--  
795 recent updates and continuing curation. *Nucleic Acids Res.* **41**, D1228-33 (2013).
- 796 54. Meyer, M. J., Das, J., Wang, X. & Yu, H. INstruct: a database of high-quality 3D  
797 structurally resolved protein interactome networks. *Bioinformatics* **29**, 1577–9  
798 (2013).
- 799 55. Mosca, R., Céol, A. & Aloy, P. Interactome3D: adding structural details to protein  
800 networks. *Nat. Methods* **10**, 47–53 (2013).
- 801 56. Meyer, M. J. *et al.* Interactome INSIDER: a structural interactome browser for  
802 genomic studies. *Nat. Methods* **15**, 107–114 (2018).
- 803 57. Fazekas, D. *et al.* Signalink 2 - a signaling pathway resource with multi-layered  
804 regulatory networks. *BMC Syst. Biol.* **7**, 7 (2013).
- 805 58. Huttlin, E. L. *et al.* Architecture of the human interactome defines protein  
806 communities and disease networks. *Nature* **545**, 505–509 (2017).
- 807 59. Davis, A. P. *et al.* The Comparative Toxicogenomics Database: update 2019.  
808 *Nucleic Acids Res.* **47**, D948–D954 (2019).
- 809 60. Szklarczyk, D. *et al.* STRING v10: protein-protein interaction networks, integrated  
810 over the tree of life. *Nucleic Acids Res.* **43**, D447-52 (2015).
- 811 61. Subramanian, A. *et al.* Gene set enrichment analysis: a knowledge-based  
812 approach for interpreting genome-wide expression profiles. *Proc. Natl. Acad. Sci.*  
813 *U. S. A.* **102**, 15545–50 (2005).
- 814 62. Roweth, H. G. *et al.* Two novel, putative mechanisms of action for citalopram-  
815 induced platelet inhibition. *Sci. Rep.* **8**, 1–14 (2018).
- 816 63. Roweth, H. G. *et al.* Citalopram inhibits platelet function independently of SERT-  
817 mediated 5-HT transport. *Sci. Rep.* **8**, 1–14 (2018).
- 818 64. Nath, S., Bachani, M., Harshavardhana, D. & Steiner, J. P. Catechins protect  
819 neurons against mitochondrial toxins and HIV proteins via activation of the BDNF  
820 pathway. *J. Neurovirol.* **18**, 445–455 (2012).
- 821 65. Park, K.-S. *et al.* (-)-Epigallocatechin-3-O-gallate counteracts caffeine-induced  
822 hyperactivity: evidence of dopaminergic blockade. *Behav. Pharmacol.* **21**, 572–

- 823 575 (2010).
- 824 66. Ramesh, E., Geraldine, P. & Thomas, P. A. Regulatory effect of epigallocatechin  
825 gallate on the expression of C-reactive protein and other inflammatory markers in  
826 an experimental model of atherosclerosis. *Chem. Biol. Interact.* **183**, 125–32  
827 (2010).
- 828 67. Han, S. G., Han, S.-S., Toborek, M. & Hennig, B. EGCG protects endothelial cells  
829 against PCB 126-induced inflammation through inhibition of AhR and induction of  
830 Nrf2-regulated genes. *Toxicol. Appl. Pharmacol.* **261**, 181–8 (2012).
- 831 68. Sheng, R., Gu, Z.-L. & Xie, M.-L. Epigallocatechin gallate, the major component of  
832 polyphenols in green tea, inhibits telomere attrition mediated cardiomyocyte  
833 apoptosis in cardiac hypertrophy. *Int. J. Cardiol.* **162**, 199–209 (2013).
- 834 69. Devika, P. T. & Stanely Mainzen Prince, P. (-)-Epigallocatechin gallate protects  
835 the mitochondria against the deleterious effects of lipids, calcium and adenosine  
836 triphosphate in isoproterenol induced myocardial infarcted male Wistar rats. *J.*  
837 *Appl. Toxicol.* **28**, 938–44 (2008).
- 838 70. Yi, Q.-Y. *et al.* Chronic infusion of epigallocatechin-3-O-gallate into the  
839 hypothalamic paraventricular nucleus attenuates hypertension and  
840 sympathoexcitation by restoring neurotransmitters and cytokines. *Toxicol. Lett.*  
841 **262**, 105–113 (2016).
- 842 71. Devika, P. T. & Prince, P. S. M. Preventive effect of (-)epigallocatechin-gallate  
843 (EGCG) on lysosomal enzymes in heart and subcellular fractions in isoproterenol-  
844 induced myocardial infarcted Wistar rats. *Chem. Biol. Interact.* **172**, 245–52  
845 (2008).
- 846 72. Hushmendy, S. *et al.* Select phytochemicals suppress human T-lymphocytes and  
847 mouse splenocytes suggesting their use in autoimmunity and transplantation.  
848 *Nutr. Res.* **29**, 568–78 (2009).
- 849 73. Shen, K. *et al.* Epigallocatechin 3-Gallate Ameliorates Bile Duct Ligation Induced  
850 Liver Injury in Mice by Modulation of Mitochondrial Oxidative Stress and  
851 Inflammation. *PLoS One* **10**, e0126278 (2015).
- 852 74. ZHEN, M. *et al.* Green tea polyphenol epigallocatechin-3-gallate inhibits oxidative  
853 damage and preventive effects on carbon tetrachloride–induced hepatic fibrosis.

- 854 *J. Nutr. Biochem.* **18**, 795–805 (2007).
- 855 75. Yasuda, Y. *et al.* (–)-Epigallocatechin gallate prevents carbon tetrachloride-  
856 induced rat hepatic fibrosis by inhibiting the expression of the PDGFR $\beta$  and IGF-  
857 1R. *Chem. Biol. Interact.* **182**, 159–164 (2009).
- 858 76. Cao, W. *et al.* iTRAQ-based proteomic analysis of combination therapy with  
859 taurine, epigallocatechin gallate, and genistein on carbon tetrachloride-induced  
860 liver fibrosis in rats. *Toxicol. Lett.* **232**, 233–245 (2015).
- 861 77. Kitamura, M. *et al.* Epigallocatechin gallate suppresses peritoneal fibrosis in mice.  
862 *Chem. Biol. Interact.* **195**, 95–104 (2012).
- 863 78. Sakla, M. S. & Lorson, C. L. Induction of full-length survival motor neuron by  
864 polyphenol botanical compounds. *Hum. Genet.* **122**, 635–643 (2008).
- 865 79. Shimizu, M. *et al.* (–)-Epigallocatechin gallate inhibits growth and activation of the  
866 VEGF/VEGFR axis in human colorectal cancer cells. *Chem. Biol. Interact.* **185**,  
867 247–252 (2010).
- 868
